# Supplementary material for: Encapsulation and release of non-fluorescent crystal violet confined in bile-salt aggregates
Source: Royal Society of Chemistry journal article supplement (doi:10.1039/d0ra06599d), 2021-01-01
Supplement: d0ra06599d1.pdf [file d0ra06599d1.pdf]

## Supporting Information

### Encapsulation and Release of Non-fluorescent Crystal Violet Confined in Bile-salt Aggregates

Prachi Sharma<sup>a</sup>, Neeraj Sohal<sup>a</sup>, Banibrata Maity<sup>\*b</sup>

<sup>a</sup>School of Chemistry and Biochemistry, Thapar Institute of Engineering and Technology,  
Patiala 147004, India.

<sup>b</sup>School of Chemistry and Biochemistry, Affiliate Faculty-TIET-Virginia Tech Center of  
Excellence in Emerging Materials, Thapar Institute of Engineering and Technology,  
Patiala-147004, India

Email: banibrata.maity@thapar.edu, baniitchem@gmail.com

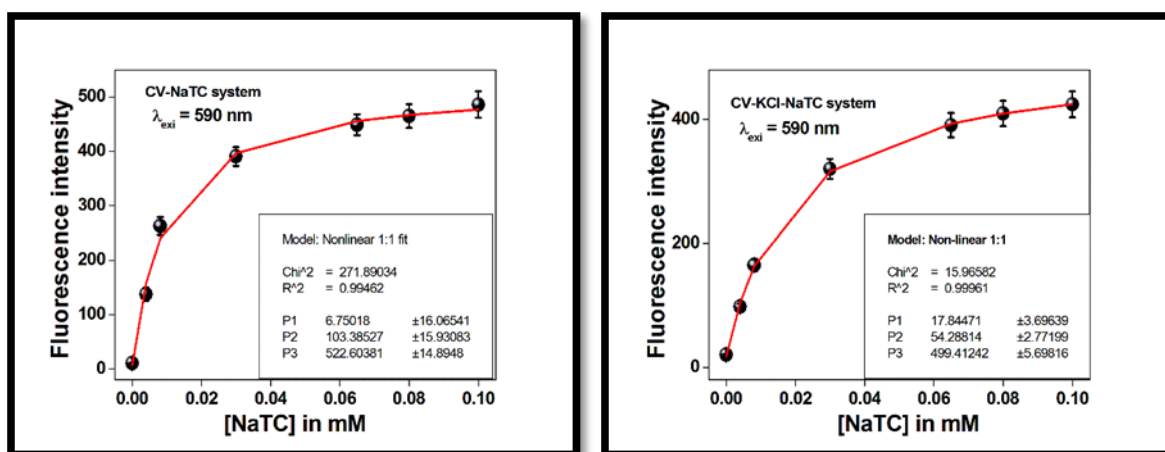

**Fig. S1** Excited state binding constant plot of CV-NaTC and CV-KCl-NaTGC at  $\lambda_{\text{exi}} = 590 \text{ nm}$ .

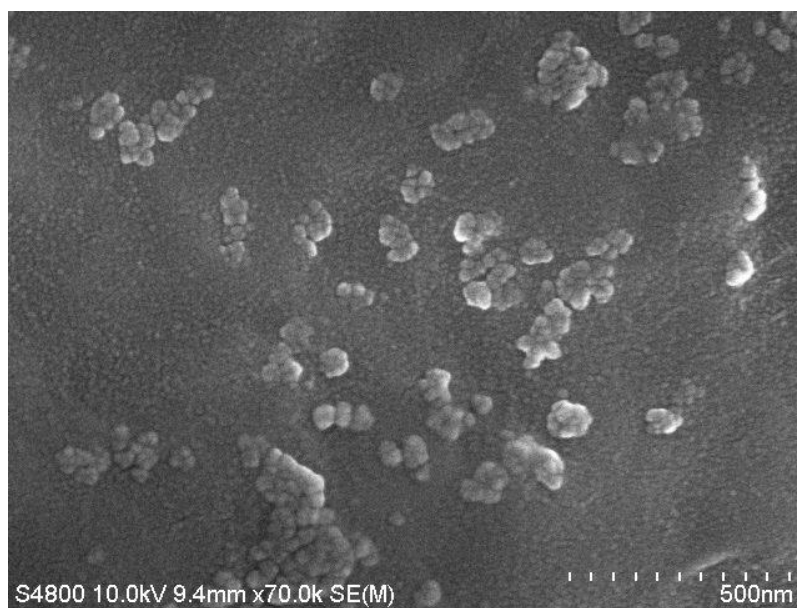

Fig. S2 FESEM image of CV-NaTC complex.

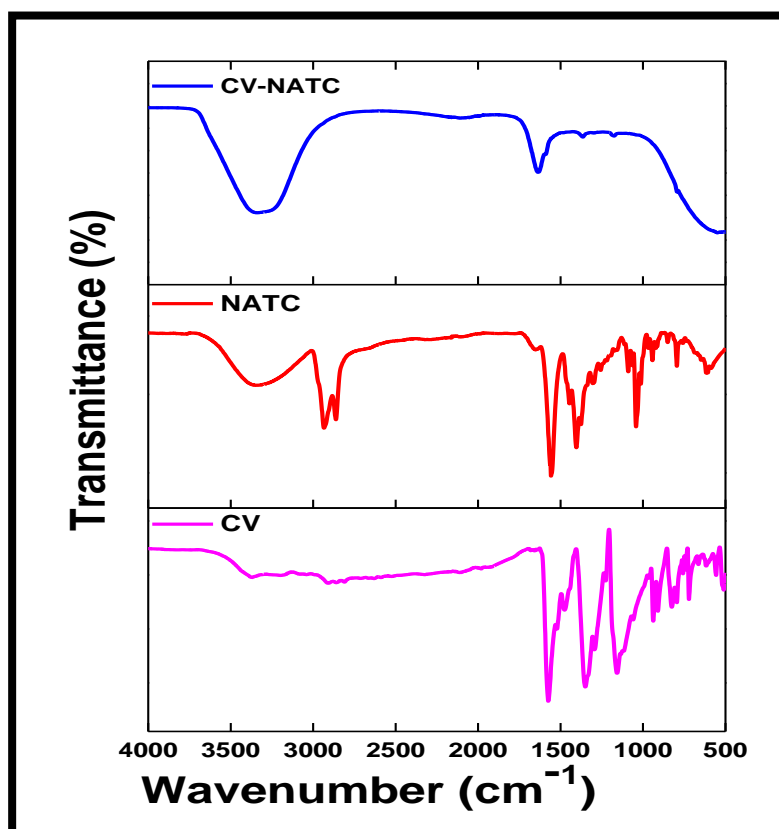

Fig. S3 FTIR spectra of CV, NaTC and CV-NaTC complex.

**Table S1** Aggregation number ( $N_{agg}$ ) of CV in bile-salt system.

| Bile-salt<br>[100mM] | Aggregation number<br>( $N_{agg}$ ) in<br>CV-bile - KCl system | Aggregation number<br>( $N_{agg}$ ) in<br>CV-KCl - bile system |
|----------------------|----------------------------------------------------------------|----------------------------------------------------------------|
| NaC                  | 4                                                              | 2                                                              |
| NaDC                 | 4                                                              | 3                                                              |
| NaTC                 | 3                                                              | 2                                                              |
| NaTGC                | 3                                                              | 2                                                              |
